# Supplementary material for: Sb-Doped metallic 1T-MoS2 nanosheets embedded in N-doped carbon as high-performance anode materials for half/full sodium/potassium-ion batteries
Source: Royal Society of Chemistry journal article supplement (doi:10.1039/d2dt01986h), 2022-01-01
Supplement: d2dt01986h1.pdf [file d2dt01986h1.pdf]

## Supporting Information

### Characterization

Using X-ray diffraction (XRD) to ascertain the crystal phase of composition at 10° to 80° by Bruker D8 diffractometer. The surface morphology and internal crystal structure of test material samples were observed by SEM (Hitachi 8100) and TEM (FEI F20 S-TWIN). The thermogravimetric analysis (TGA) was conducted to measure the compound by TA-SDT Q600 analyzer. The heating rate in the atmosphere was 10 °C min<sup>-1</sup>. The attribute of chemical bonds was determined by Raman spectroscopy (DXR2xi) of a 532 nm laser. The surface property of the composition was research by X-ray photoelectron spectroscopy (XPS). Galvanostatic charge/discharge tests and the galvanostatic intermittent titration technique (GITT) of the electrode materials were tested on Land CT 2001A tester between 0.01 to 3 V. The cyclic voltammetry (CV) tests were conducted by an Ivium-n-Stat electrochemical workstation at diverse scan rates (vs. Na/Na<sup>+</sup> or K/K<sup>+</sup>).

### Electrochemical measurements

For SIBs, the anode electrode was formed by blending the active component, super P and carboxymethyl cellulose (CMC) in a proportion of 8: 1: 1 in deionized water. Each active material loaded in the anode electrodes is closed to 1.5-2.5 mg cm<sup>-2</sup> for SIBs tests system. The solution was fixed to copper foil and dried at 80 °C overnight under vacuum. In the half sodium-ion batteries, 1 M NaClO<sub>4</sub> in 1:1 (weight ratio) EC/DMC with 5% fluoroethylene carbonate (FEC) additives and whatman glass fiber were conducted as electrolyte and separator, respectively. In the half-cells, sodium metal was served as the counter electrode. While the capacity ratio of 1T-MoS<sub>2</sub>-Sb anode and NVP cathode was optimized to 1: 1.2 in the sodium full-cells. The 1T-MoS<sub>2</sub>-Sb anode was presodiated for three cycles before assembling full cells.

As for PIBs half-battery, the anode was fabricated by admixing the active materials (1T-MoS<sub>2</sub>-Sb, 80 wt.%) with super P (10 wt.%) and CMC (10 wt.%) in deionized water. Every active material loaded in active materials in the anode electrodes is closed to 1.0-2.0 mg cm<sup>-2</sup> for PIBs tests. In addition, 3.0 M potassium bis(fluorosulfonyl)imide (KFSI) in DME (100% Vol%) was employed as electrolyte. The counter electrode was made up of sheet potassium metal. Last but not least, all the assembly work was carried out in a glove box filled with high pure argon.

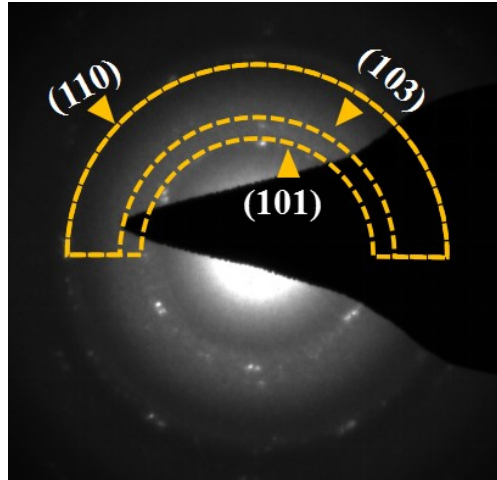

**Fig. S1** The SAED images of the 1T-MoS<sub>2</sub>-Sb composite.

The ratio of molybdenum and antimony of the samples was characterized by inductively coupled plasma atomic emission spectrometry (ICP-AES). The weight ratio of Mo : Sb in 1T-MoS<sub>2</sub>-Sb was 1:0.012. The content of MoS<sub>2</sub> in 1T-MoS<sub>2</sub>-Sb (MoS<sub>2</sub> wt%) can be calculated as below:

$$m_{\text{MoS}_2} : m_{\text{Sb}} = 1 : (96 / 160 * 0.012) = 1 : 0.0072$$

$$\text{MoS}_2 \text{ wt\%} = W_{\text{remain}} / M_{\text{MoO}_3} * M_{\text{MoS}_2} / W_{100^\circ\text{C}} / (1+0.0072) = (95.87\%-33.82\%) / 144 * 160 / 95.87\% / (1+0.0072) = 71.4 \text{ wt\%}.$$

$$\text{Sb wt\%} = \text{MoS}_2 \text{ wt\%} * 0.0072 = 0.5\%$$

W 100°C: The weight retained at the temperature of 150°C.

The content of MoS<sub>2</sub> in 2H-MoS<sub>2</sub>-1 (MoS<sub>2</sub> wt%) can be calculated as:

$$\text{MoS}_2 \text{ wt\%} = W_{\text{remain}} / M_{\text{MoO}_3} * M_{\text{MoS}_2} / W_{100^\circ\text{C}} = (95.87\%-34.05\%) / 144 * 160 / 95.87\% = 71.6 \text{ wt\%}$$

The content of MoS<sub>2</sub> in 2H-MoS<sub>2</sub>-2 (MoS<sub>2</sub> wt%) can be calculated as:

$$\text{MoS}_2 \text{ wt\%} = W_{\text{remain}} / M_{\text{MoO}_3} * M_{\text{MoS}_2} / W_{100^\circ\text{C}} = (95.87\%-13.86\%) / 144 * 160 / 95.87\% = 95.0 \text{ wt\%}$$

The contents of MoS<sub>2</sub>, Sb and the chitosan derived carbon in 1T-MoS<sub>2</sub>-Sb are ca. 71.4, 0.5 and 28.1%, respectively.

The calculated proportion of MoS<sub>2</sub> in the 1T-MoS<sub>2</sub>-Sb, 2H-MoS<sub>2</sub>-1 and 2H-MoS<sub>2</sub>-2 samples are ca. 71.4, 71.6 and 95.0 wt.%, respectively.

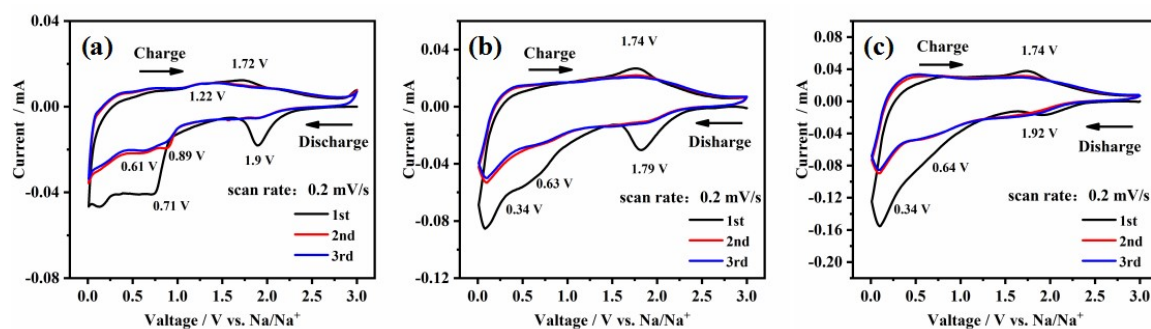

**Fig. S2** CV curves of the (a) 1T-MoS<sub>2</sub>-Sb, (b) 2H-MoS<sub>2</sub>-1 and (c) 2H-MoS<sub>2</sub>-2 electrodes at 0.2 mV s<sup>-1</sup> for SIBs.

**Table S1** Comparisons on the electrochemical behavior of 1T-MoS<sub>2</sub>-Sb and other reported anodes.

| Electrode materials                      | fields    | Cycling                            | Current                         | Cycle numbers | Ref.      |
|------------------------------------------|-----------|------------------------------------|---------------------------------|---------------|-----------|
|                                          |           | capacity<br>(mAh g <sup>-1</sup> ) | density<br>(A g <sup>-1</sup> ) |               |           |
| 1T-MoS <sub>2</sub> -Sb                  | SIBs      | 494                                | 0.1                             | 50            | This work |
|                                          |           | 253                                | 1                               | 2200          |           |
|                                          | PIBs      | 343                                | 0.1                             | 100           | This work |
|                                          |           | 150                                | 1                               | 1000          |           |
| Full cell                                | 243       | 0.5                                | 100                             | This work     |           |
| 1T MoS <sub>2</sub> nanosheets           | SIBs      | 410                                | 0.1                             | 150           | 16        |
|                                          |           | 324                                | 1                               | 200           |           |
| 1T-MoS <sub>2</sub> -graphene            | SIBs      | 313                                | 0.05                            | 200           | 30        |
| 1T-MoS <sub>2</sub> /MoO <sub>x</sub> @N | PIBs      | 209                                | 0.05                            | 100           | 56        |
|                                          | Full cell | 164                                | 0.5                             | 300           | 56        |
| Activated graphite                       | PIBs      | 100                                | 0.2                             | 100           | 57        |
| NCNTs                                    | PIBs      | 255                                | 0.05                            | 300           | 58        |
|                                          |           | 102                                | 2                               | 500           |           |
| KMnF-LE                                  | PIBs      | 110                                | 0.4                             | 10000         | 59        |

|                                       |      |     |      |      |    |
|---------------------------------------|------|-----|------|------|----|
| FeS <sub>2</sub> @C                   | PIBs | 292 | 0.1  | 300  | 60 |
| 1T-MoS <sub>2</sub> @rGO              | SIBs | 450 | 0.1  | 60   | S1 |
|                                       |      | 280 | 1    | 100  |    |
| MoS <sub>2</sub> /NCS                 | PIBs | 374 | 0.05 | 100  | S2 |
|                                       |      | 212 | 1    |      |    |
| MoS <sub>2</sub> @SnO <sub>2</sub> @C | SIBs | 337 | 0.1  | 200  | S3 |
|                                       |      | 244 | 1    | 1000 |    |
| MoS <sub>2</sub> -WS <sub>2</sub> -C  | PIBs | 350 | 0.1  | 100  | S4 |
| MoS <sub>2</sub> @HPCS                | PIBs | 255 | 0.5  | 100  | S5 |
|                                       |      | 126 | 1    | 500  |    |

## Refs

- [S1] X. Yu, R. Li, X. Hu, R. He, K. Xue, R. Sun, T. Yang, W. Wang and X. Fang, *J. Solid State Chem.*, 2021, **297**, 122027.
- [S2] G. Suo, J. Zhang, D. Li, Q. Yu, M. He, L. Feng, X. Hou, Y. Yang, X. Ye, L. Zhang and W. A. Wang, *J. Colloid Interf. Sci.*, 2020, **556**, 427-433.
- [S3] Z. Chen, D. Yin and M. Zhang, *Small*, 2018, **14**, 1703818.
- [S4] J. H. Choi, G. D. Park and Y. C. Kang, *Chem. Eng. J.*, 2021, **408**, 127278.
- [S5] J. Hu, Y. Xie, X. Zhou and Z. Zhang, *ACS Appl. Mater. Interfaces*, 2020, **12**, 1232-1240.
